# Supplementary material for: Cortical Thinning and Neuropsychiatric Outcomes in Children Exposed to Prenatal Adversity: A Role for Placental CRH?
Source: Atypon-hosted journal article supplement (doi:10.1176/appi.ajp.2017.16121433), 2018-03-02
Supplement: appi.ajp.2017.16121433.ds001.pdf [file appi.ajp.2017.16121433.ds001.pdf]

## SUPPLEMENTARY RESULTS

### ***Consort diagram and description of MRI cohort***

**Figure S1** illustrates the selection steps for recruiting 6-9-year-old subjects for the MRI scans from the prospective cohort of 834 initially approached to participate in studies of pregnancy and infant outcomes. **Table 1** presents means and tests of significant differences for subjects in the MRI protocol and subjects eligible but not in the MRI protocol. **Table S1A** presents parametric analysis of continuous variables for the child, birth outcomes and maternal characteristics. There are no significant differences between these two cohorts of subjects for any variables compared. **Table S1B** presents means and nonparametric (Mann-Whitney U tests) tests for categorical variables. A significant difference between the groups was detected for one variable—Mother’s cohabitation status. The difference between the groups was primarily related to a higher frequency of “Neither legally married nor cohabitating with partner” in the cohort not participating in the MRI protocol. In summary, these two cohorts are virtually identical.

### ***Cortical volumes associated with total pCRH exposure across gestation***

Children exposed to high levels of pCRH throughout fetal life exhibited significant thinning of the whole cortical mantle (12%; **Table S2A**). Regional analysis indicated

that cortical thinning associated with pCRH levels was primarily observed in the temporal (15%) and the frontal (16%) regions (**Table S2A**). Neither average concentrations of pCRH across gestation nor levels at any gestational interval were associated with *increased* cortical thickness either globally or in any cortical region (**Table S2B**).

### ***Tables of FreeSurfer subregional parcellations at 19 and 31 weeks gestation***

**Tables S3** and **S4** present the percentages of FreeSurfer sub-regional parcellations associated with exposure to pCRH at 19 weeks' GA (**Table S3**) and 31 weeks' GA (**Table S4**). In **Table S3** it is apparent that the bilateral surface of the frontal regions, specifically the frontal pole is primarily thinner in children exposed to CRH at 19 weeks GA. **Table S4** illustrates a somewhat broader association between cortical thinning and later exposure to CRH. However the most striking regional association with pCRH at 31 weeks is evident bilaterally in the temporal poles.

### **Conversion to standard scores**

In order to combine the pCRH values, each raw value distribution was converted to a standard z-score distribution. Separately at 19 and 30 weeks, CRH values were converted with the formula:

$$z = \frac{(X - \mu)}{\sigma}$$

...where X is a CRH value,  $\mu$  is the population mean for CRH, and  $\sigma$  is the standard deviation.

The standard score converts CRH concentrations to a z-score distribution with a mean of 0 and a standard deviation of 1. Values for individuals are expressed in terms of standard deviations from their means. Thus a z-score of 1 indicates the subject has a CRH value that is 1 standard deviation above the mean.

### ***Analysis of logarithmic transformation of pCRH at 19 weeks gestation***

A logarithmic transformation of pCRH values at 19 weeks GA was computed to account for potential outliers. The two “outliers” were within normal physiological limits. Moreover, these women had consistently elevated levels across gestation. To perform the transform, a constant was added to the standard scores to eliminate zeros and negative numbers. (The log of a negative number is not a number and that the log of zero is negative infinity). The skewness dropped from 2.7 to 1.35. The relation between transformed CRH levels and cortical thickness for the areas in Figures 2B-D in the main text remained significant ( $r$ 's 0.26 [ $p < .025$ ]-0.39 [ $p < .01$ ]).

**Table S5** presents the FreeSurfer subregional parcellations for log transformed pCRH. The results are nearly identical with the percentages for non-transformed data in **Table S3**. The critical comparisons are highlighted.

### ***Sex Differences—Exploratory analysis***

We have reported that the age-related changes (6-9 years of age) in cortical and white matter volume (Muftuler et al, 2011; 2012) were stronger for girls than for boys. Because of the age-related differences in cortical volume, we adjusted for age at the time of testing in all the analyses reported here. The differences in the age-related changes between girls and boys prompted us to test for sex differences in

predictors and potential covariates in our cohort. As presented in **Table S6**, there were no sex differences in the predictors or potential covariates examined in this study. **Figure S2** demonstrates that patterns of association between prenatal exposure to elevated pCRH at either 19 or 31 weeks and cortical volumes differ for boys from the combined images. The patterns of association for girls exposed to elevated CRH at 19 weeks gestation differ to the combined images. In contrast, the patterns of association between prenatal exposure at 31 weeks and decreased temporal pole volume for girls are similar to the combined images.

### ***Optional Visits—Exploratory analysis***

Prenatal visits 15 (N=57) and 35 (N=55) weeks' gestational age (GA) were optional with smaller samples than the “early” and “late” cohorts. Exploratory analysis indicated that CRH exposure at 15 weeks GA was associated with significant thinning of the frontal cortex—very similar to the findings at 19 weeks GA. The significant association between pCRH and cortical thinning was bilateral but strongest in the right (19% of the structure) compared with 11% in the left frontal region. Regional analyses identified that the lateral frontal pole (40% LH and 65% RH) and the medial orbital frontal [22% LH, 33% RH] regions were the areas in which cortical thinning was most strongly associated with levels of pCRH. Pial maps depict areas of significant thinning linked with fetal pCRH exposure at 15 weeks GA and scatterplots illustrate three subregions of the frontal cortex with the strongest association (**Figure S3**). These results were highly consistent with the findings at 19 weeks GA.

### ***pCRH increases across gestation***

The human placenta synthesizes and releases CRH into the maternal and fetal circulation. Placental CRH is identical to hypothalamic CRH in structure, immunoreactivity and bioactivity (Petraglia, Sutton, & Vale, 1989; Sasaki et al., 1987, 1988). We observed the expected elevation of pCRH levels as pregnancy advanced in our cohort (**Figure S4**).

### **Correlations of *pCRH* with potential maternal, birth and child variables**

The findings from **Tables S7A-B** indicate that there are no significant associations between pCRH at 19 and 31 weeks and maternal sociodemographic and mood/anxiety indices. **Table S7C** presents data for the entire sample.

## **SUPPLEMENTAL METHODS**

### **CRH assay details**

Total CRH concentrations were determined by a radioimmunoassay with reported sensitivity of 2.04 pg/ml (RIA; Bachem Peninsula Laboratories, San Carlos, CA). Plasma samples (1-2 ml) were extracted with three volumes of ice-cold methanol, mixed, allowed to stand for 10 minutes at 4°C, and centrifuged at 1700 g and 4°C for 20 minutes (Sandman et al., 2006). Pellets were washed with 0.6 ml methanol, and the combined supernatants were dried down in a Savant SpeedVac concentrator. Reconstituted samples with assay buffer were incubated (100 µl/assay tube) with anti- CRH serum (100 µl) for 48 hours at 4°C, followed by a 24-hour

incubation with <sup>125</sup>I- CRH at 4°C. Labeled and unlabeled CRH were collected by immunoprecipitation with goat anti-rabbit IgG serum and normal rabbit serum after 90 minutes of incubation at room temperature. Samples were then centrifuged at 1700 g and 4°C for 20 minutes, after which the aspirated pellets were quantified with a gamma scintillation counter. This assay has less than 0.01% cross-reactivity with ovine CRH, 36% cross-reactivity with bovine CRH, and non-detectable reactivity with human ACTH. Intra-assay and inter- assay coefficients ranged from 5% to 15%, respectively.

### **Subjects with motion artifacts**

There were no differences between the subjects excluded because of motion artifacts and those without motion artifacts as described in Table S8 below. We also provide characteristics for the three subjects with “marginal” scans. The summary table presents mean data for the participants who completed the scan, the 7 subjects with motion artifacts and 3 subjects with “marginal” images (who were excluded from the analysis).

**TABLE S8. Data for subjects with motion artifacts in their MRI images (excluded from analysis)**

|                       | <b>MOTION<br/>ARTIFACTS (N=7)</b> | <b>NO MOTION<br/>ARTIFACTS (N=97)</b> | <b>MARGINAL(N=3)</b> |
|-----------------------|-----------------------------------|---------------------------------------|----------------------|
| <b>AGE (YEARS)</b>    | <b>7.2</b>                        | <b>7.5</b>                            | <b>7.3</b>           |
| <b>SEX</b>            | <b>71%M</b>                       | <b>50%M</b>                           | <b>33%M</b>          |
| <b>WISC %TILE</b>     | <b>63</b>                         | <b>67</b>                             | <b>51</b>            |
| <b>ANXIETY (CBCL)</b> | <b>61</b>                         | <b>53</b>                             | <b>52</b>            |
| <b>CRH 15 WKS</b>     | <b>-0.57</b>                      | <b>.16</b>                            | <b>1.01</b>          |
| <b>CRH 19 WKS</b>     | <b>-0.75</b>                      | <b>-0.01</b>                          | <b>0.52</b>          |
| <b>CRH 25 WKS</b>     | <b>0.14</b>                       | <b>-0.07</b>                          | <b>0.54</b>          |
| <b>CRH 31 WKS</b>     | <b>-0.54</b>                      | <b>0.07</b>                           | <b>0.21</b>          |
| <b>CRH 37 WKS</b>     | <b>-0.17</b>                      | <b>-0.06</b>                          | <b>-0.01</b>         |

**TABLE S9. pCRH levels (standard scores) at each gestational interval with the percentage of the sample providing complete data at each interval**

| <b>SAMPLING INTERVAL</b>       | <b>pCRH VALUES IN<br/>STANDARD SCORES</b> | <b>% OF TOTAL<br/>SAMPLE</b> |
|--------------------------------|-------------------------------------------|------------------------------|
| <b>15 weeks GA (optional)</b>  | <b>-0.63 ±0.06 pg/ml</b>                  | <b>59%</b>                   |
| <b>19 Weeks GA</b>             | <b>-0.58±0.09 pg/ml</b>                   | <b>73%</b>                   |
| <b>25 Weeks GA</b>             | <b>-0.41±0.21 pg/ml</b>                   | <b>52%</b>                   |
| <b>31 Weeks GA</b>             | <b>0.27±0.67 pg/ml</b>                    | <b>82%</b>                   |
| <b>~35 Weeks GA (optional)</b> | <b>1.60±0.81 pg/ml</b>                    | <b>57%</b>                   |

## REFERENCES

- Muftuler, LT., Davis, EP, Buss, C., Head, K., Hasso, AN, & Sandman, CA. Cortical and subcortical changes in typically developing preadolescent children. *Brain Research*, 2011, 1399, 15-24.
- Muftuler, LT, Davis, EP, Buss, C, Solodkin, A, Su, MY, Head, KM, Hasso AN & Sandman, CA. Development of white matter pathway in typically developing preadolescent children. *Brain Research*, 2012, 1466, 33-43 PMID: 22634375.
- Sandman, C. A., Glynn, L., Dunkel-Schetter, C., Wadhwa, P., Garite, T., Chicz-DeMet, A., & Hobel, C. (2006). Elevated maternal cortisol early in pregnancy predicts third trimester levels of placental corticotropin releasing hormone (CRH): Priming the placental clock. *Peptides*, 27, 1457-1463. doi: 10.1016/j.peptides.2005.10.002
- Petraglia, F., Sutton, S., & Vale, W. (1989). Neurotransmitters and peptides modulate the release of immunoreactive corticotropin-releasing factor from cultured human placental cells. *Am J Obstet Gynecol*, 160(1), 247-251. doi: 10.1016/0002-9378(89)90130-0
- Sasaki, A., Shinkawa, O., Margioris, A. N., Liotta, A. S., Sato, S., Murakami, O., . . . Yoshinaga, K. (1987). Immunoreactive corticotropin-releasing hormone in human plasma during pregnancy, labor, and delivery. *J Clin Endocrinol Metab*, 64, 224-229. doi: 10.1210/jcem-64-2-224
- Sasaki, A., Tempst, P., Liotta, A. S., Margioris, A. N., Hood, L. E., Kent, S. B., . . . Krieger, D. T. (1988). Isolation and characterization of a corticotropin-releasing hormone-like peptide from human placenta. *J Clin Endocrinol Metab*, 67, 768-773. doi: 10.1210/jcem-67-4-768



**FIGURE S1. Consort diagram illustrating the selection of subjects from the initial studies to evaluate the influence of stress on pregnancy and infant/child outcomes.**

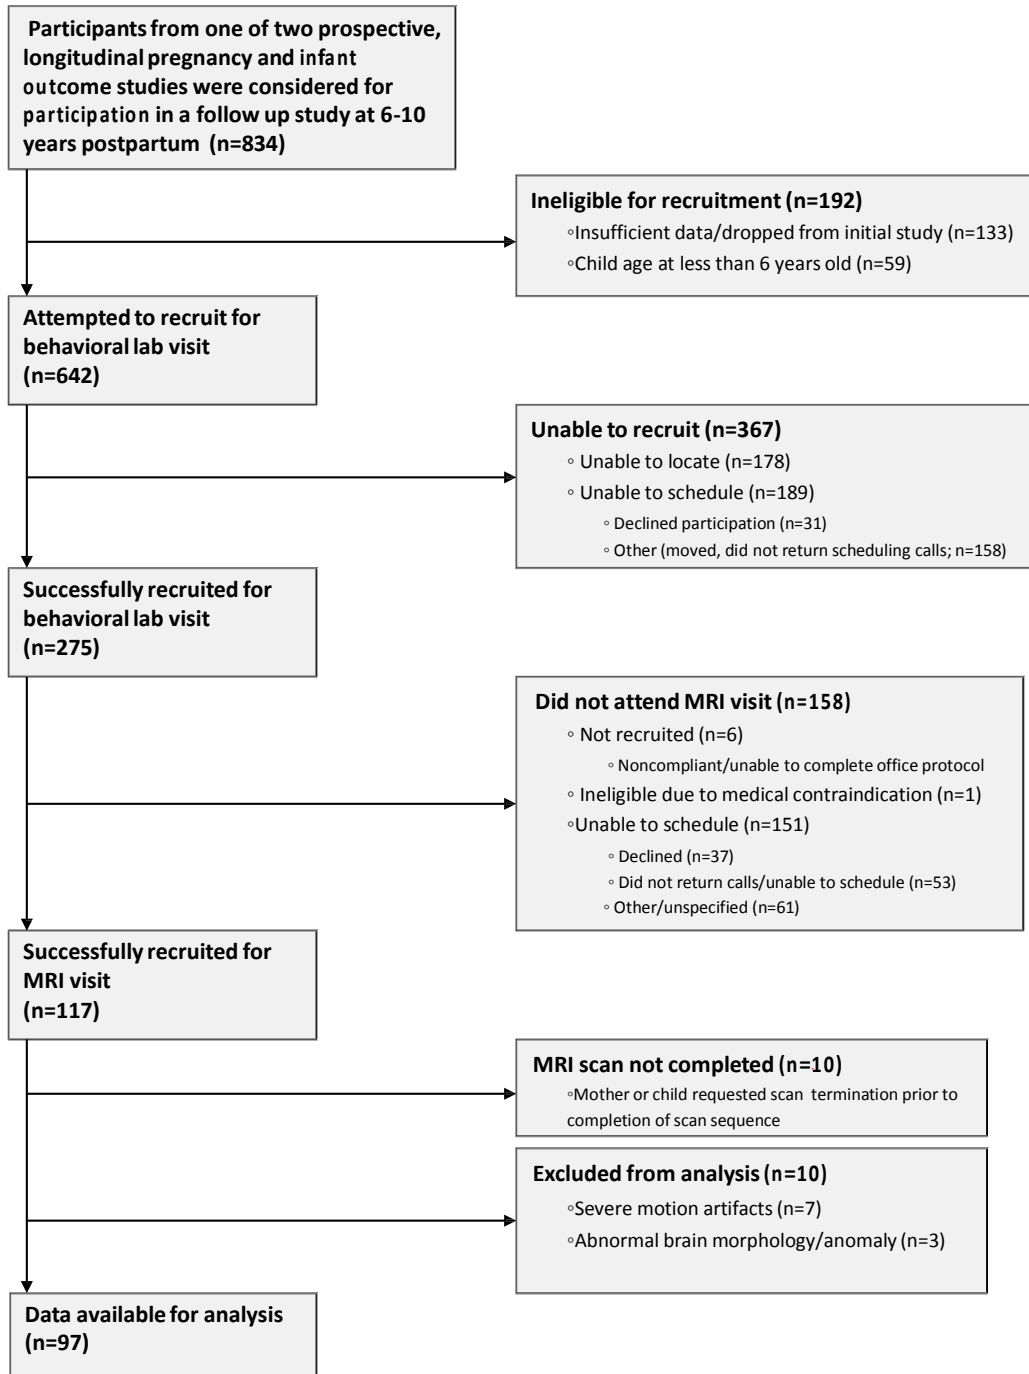

**FIGURE S2. Pial maps (A) from FreeSurfer illustrating statistically significant areas of cortical thinning associated with total concentration of prenatal levels of pCRH across gestation (N=97). Representative scatterplots (B-D) of the significant associations between pCRH and cortical thinning in cortical subregions (B  $r=0.26$ ,  $p<0.01$ ; C  $r=0.36$ ,  $p<0.001$ ; D  $r=0.37$ ,  $p<0.001$ ).**

**Figure S2: The association between exposure to pCRH and cortical volumes for girls and boys**

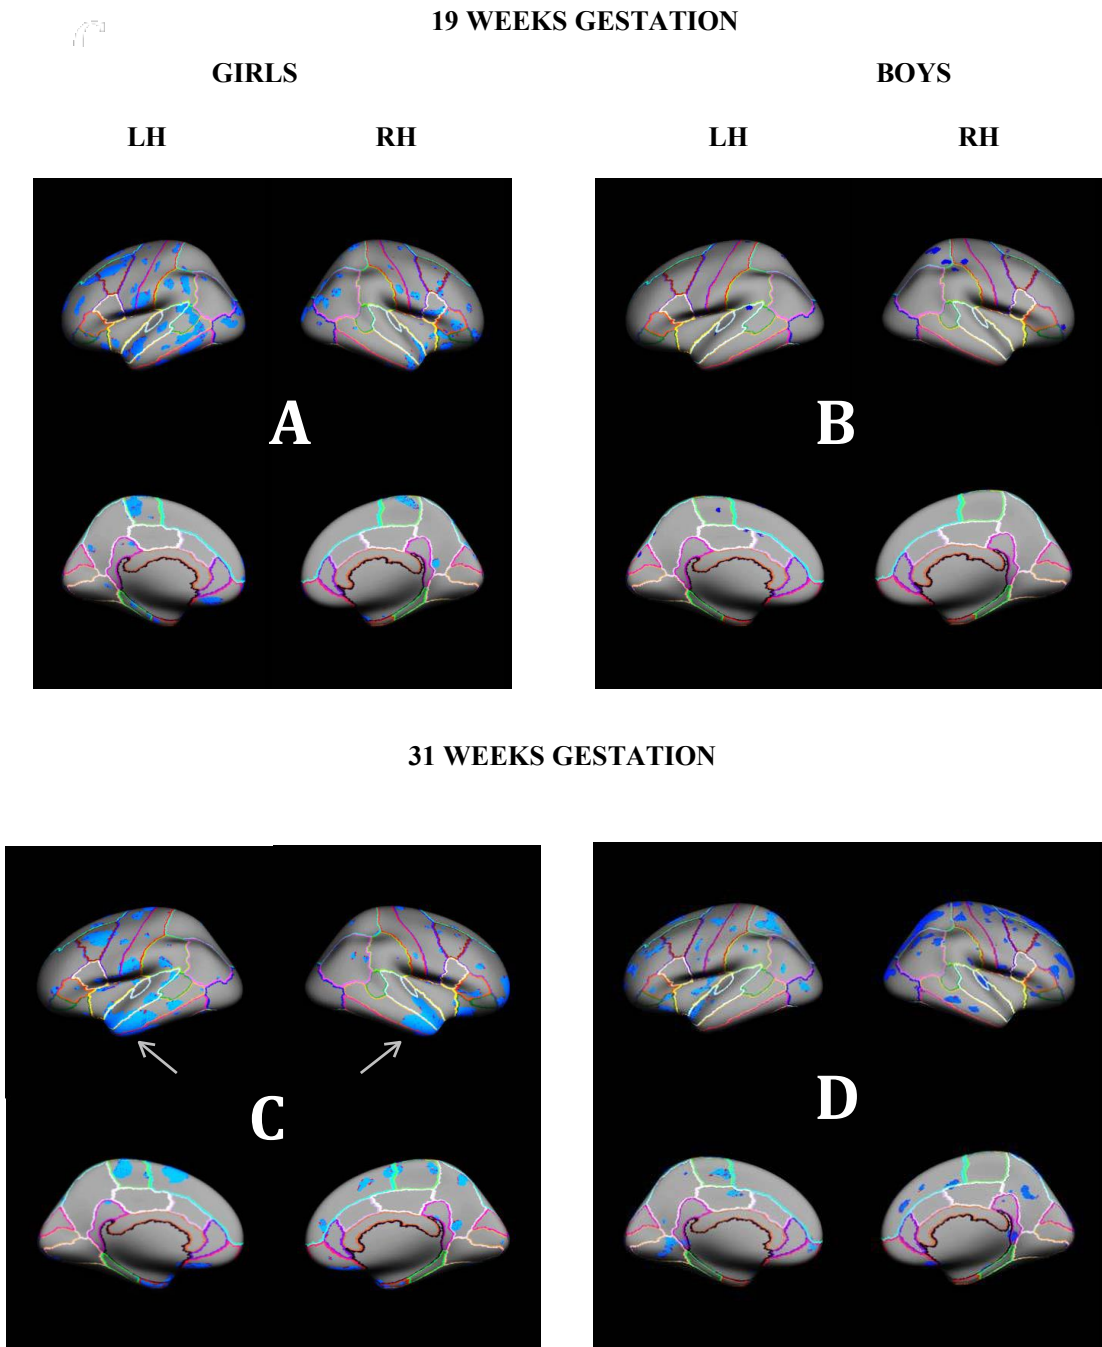

**FIGURE S3. Pial maps (A) from FreeSurfer statistically significant areas of cortical thinning associated with prenatal levels of pCRH at 15 weeks' gestation (N=57). Representative scatterplots (B-D) of the significant associations between pCRH and cortical thinning in cortical subregions (B  $r=0.31$ ,  $p<0.01$ : C  $r=0.42$ ,  $p<0.001$ : D  $r=0.55$ ,  $p<0.001$ ).**

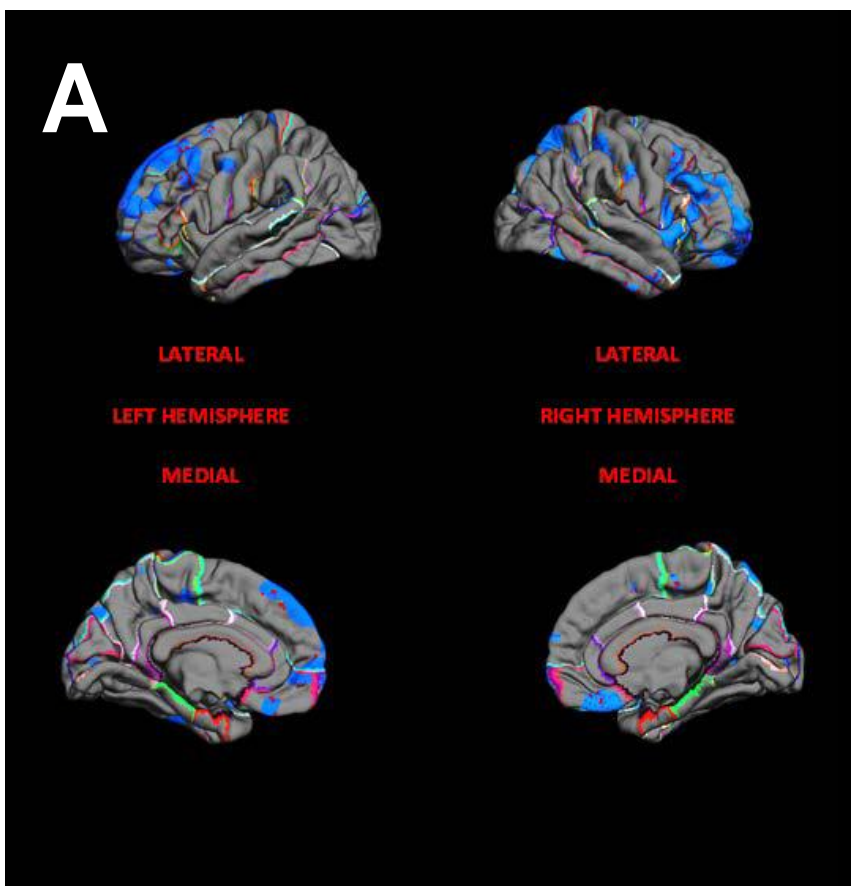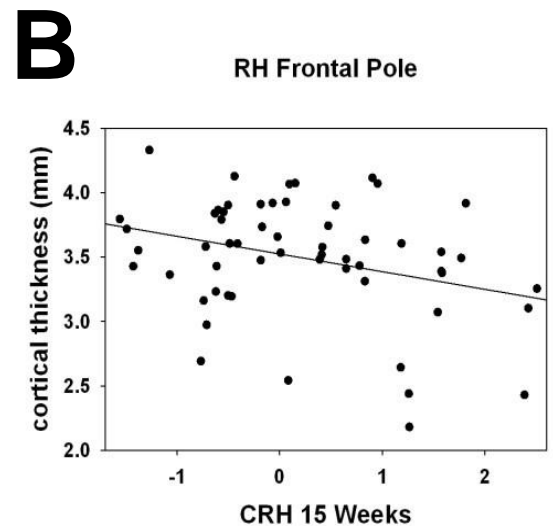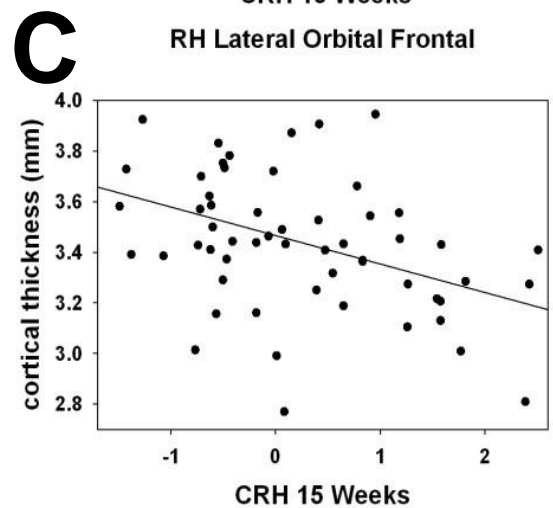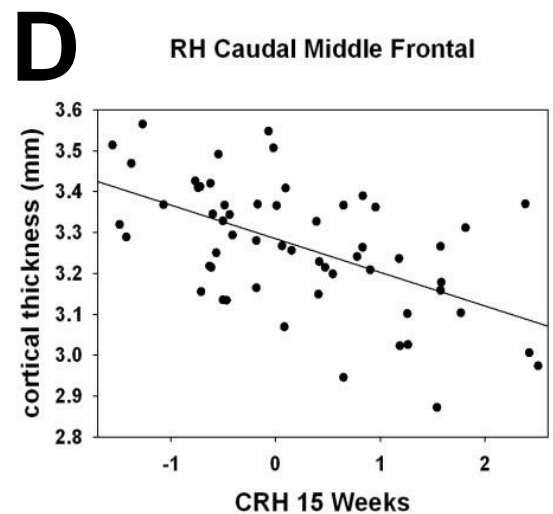

**TABLE S1A. Comparing Subjects in the MRI Protocol With Subjects Not in Protocol**

|                                      |       | N   | Mean    |                |                |     |       |     |
|--------------------------------------|-------|-----|---------|----------------|----------------|-----|-------|-----|
|                                      |       | N   | MEAN    | Std. Deviation |                | d   | F     | SI  |
| Child's age (IN YEARS) at lab visit  | noMRI | 167 | 7.1442  | .84140         | Between Groups | 1   | 1.895 | .17 |
|                                      | mri   | 108 | 7.0029  | .81599         | Within Groups  | 273 |       |     |
|                                      | Total | 275 | 7.0887  | .83289         | Total          | 274 |       |     |
| Mother's age (IN YEARS) at lab Visit | noMRI | 167 | 37.6072 | 5.31953        | Between Groups | 1   | .008  | .93 |
|                                      | mri   | 108 | 37.6683 | 6.21935        | Within Groups  | 273 |       |     |
|                                      | Total | 275 | 37.6312 | 5.67888        | Total          | 274 |       |     |
| Maternal age (IN YEARS) at delivery  | noMRI | 167 | 30.4630 | 5.28280        | Between Groups | 1   | .085  | .77 |
|                                      | mri   | 108 | 30.6654 | 6.10207        | Within Groups  | 273 |       |     |
|                                      | Total | 275 | 30.5425 | 5.60877        | Total          | 274 |       |     |
| Final GAB (in WEEKS)                 | noMRI | 167 | 39.1711 | 1.58407        | Between Groups | 1   | .031  | .86 |
|                                      | mri   | 108 | 39.2051 | 1.55102        | Within Groups  | 273 |       |     |
|                                      | Total | 275 | 39.1844 | 1.56842        | Total          | 274 |       |     |
| birth weight (in grams)              | noMRI | 163 | 3414.28 | 527.684        | Between Groups | 1   | .345  | .55 |
|                                      | mri   | 105 | 3454.73 | 584.401        | Within Groups  | 266 |       |     |
|                                      | Total | 268 | 3430.13 | 549.880        | Total          | 267 |       |     |
| Apgar score at five minutes          | noMRI | 163 | 8.9     | .28            | Between Groups | 1   | 1.691 | .19 |
|                                      | mri   | 106 | 9.0     | .23            | Within Groups  | 267 |       |     |
|                                      | Total | 269 | 8.9     | .26            | Total          | 268 |       |     |
| Total number of OB Risks             | noMRI | 156 | .3      | .60            | Between Groups | 1   | .478  | .49 |
|                                      | mri   | 98  | .3      | .62            | Within Groups  | 252 |       |     |
|                                      | Total | 254 | .3      | .61            | Total          | 253 |       |     |
| Years of school completed            | noMRI | 167 | 15.20   | 2.10           | Between Groups | 1   | .120  | .72 |
|                                      | mri   | 108 | 15.11   | 1.88           | Within Groups  | 273 |       |     |
|                                      | Total | 275 | 15.16   | 2.01           | Total          | 274 |       |     |
| WAIS: POI index score                | noMRI | 165 | 100.87  | 16.631         | Between Groups | 1   | 2.251 | .13 |
|                                      | mri   | 107 | 103.94  | 16.277         | Within Groups  | 270 |       |     |
|                                      | Total | 272 | 102.08  | 16.531         | Total          | 271 |       |     |
| STAI- MEAN Score                     | noMRI | 163 | 1.7387  | .47346         | Between Groups | 1   | .061  | .80 |
|                                      | mri   | 108 | 1.7244  | .46147         | Within Groups  | 269 |       |     |
|                                      | Total | 271 | 1.7330  | .46791         | Total          | 270 |       |     |
| BDI - Total MEAN score               | noMRI | 161 | .3304   | .38080         | Between Groups | 1   | .624  | .43 |
|                                      | mri   | 108 | .2948   | .33531         | Within Groups  | 267 |       |     |
|                                      | Total | 269 | .3161   | .36300         | Total          | 268 |       |     |

**TABLE S1B. Nonparametric Tests of Differences Between Subjects in MRI Protocol With Subjects Eligible But Not in MRI Protocol**

**SUBJECTS NOT IN MRI PROTOCOL**

|        | Frequency | Percent |
|--------|-----------|---------|
| male   | 71        | 42.5    |
| female | 96        | 57.5    |

**CHILD SEX**  
P<0.22 (ns)

**SUBJECTS IN MRI PROTOCOL**

|        | Frequency | Percent |
|--------|-----------|---------|
| male   | 54        | 50.0    |
| female | 54        | 50.0    |

|                           | Frequency | Percent |
|---------------------------|-----------|---------|
| Hispanic                  | 28        | 16.8    |
| non-hispanic white        | 78        | 46.7    |
| African American or Black | 15        | 9.0     |
| Asian                     | 11        | 6.6     |
| Multi-Ethnic              | 35        | 21.0    |

**CHILD ETHNICITY**  
P<0.32 (ns)

|                           | Frequency | Percent |
|---------------------------|-----------|---------|
| Hispanic                  | 27        | 25.0    |
| non-hispanic white        | 45        | 41.7    |
| African American or Black | 5         | 4.6     |
| Asian                     | 8         | 7.4     |
| Multi-Ethnic              | 23        | 21.3    |

|                           | Frequency | Percent |
|---------------------------|-----------|---------|
| Hispanic                  | 33        | 19.8    |
| non-hispanic white        | 84        | 50.3    |
| African American or Black | 17        | 10.2    |
| Asian                     | 13        | 7.8     |
| Multi-Ethnic              | 19        | 11.4    |
| other                     | 1         | .6      |

**MOTHERS ETHNICITY**  
P<0.27 (ns)

|                           | Frequency | Percent |
|---------------------------|-----------|---------|
| Hispanic                  | 30        | 27.8    |
| non-hispanic white        | 48        | 44.4    |
| African American or Black | 6         | 5.6     |
| Asian                     | 16        | 14.8    |
| Multi-Ethnic              | 7         | 6.5     |
| other                     | 1         | .9      |

|                      | Frequency | Percent |
|----------------------|-----------|---------|
| under \$20,000       | 6         | 3.6     |
| \$20,001 - \$40,000  | 15        | 9.0     |
| \$40,001 - \$60,000  | 20        | 12.0    |
| \$60,001 - \$80,000  | 26        | 15.6    |
| \$80,001 - \$100,000 | 18        | 10.4    |
| over \$100,000       | 81        | 48.5    |

**HOUSEHOLD INCOME PREVIOUS YEAR**  
P<0.52(ns)

|                      | Frequency | Percent |
|----------------------|-----------|---------|
| under \$20,000       | 5         | 4.7     |
| \$20,001 - \$40,000  | 8         | 7.4     |
| \$40,001 - \$60,000  | 10        | 9.3     |
| \$60,001 - \$80,000  | 19        | 17.6    |
| \$80,001 - \$100,000 | 19        | 17.6    |
| over \$100,000       | 51        | 47.2    |

|                                                               | Frequency | Percent |
|---------------------------------------------------------------|-----------|---------|
| Legally Married                                               | 122       | 73.1    |
| Legally married, but currently separated/not living w partner | 4         | 2.4     |
| Cohabiting w partner, but not legally married                 | 11        | 6.6     |
| Neither legally married nor cohabitating w partner            | 28        | 16.8    |

**MOTHER'S COHABITATION STATUS**  
P<0.01

|                                                               | Frequency | Percent |
|---------------------------------------------------------------|-----------|---------|
| Legally Married                                               | 93        | 86.1    |
| Legally married, but currently separated/not living w partner | 2         | 1.9     |
| Cohabiting w partner, but not legally married                 | 8         | 7.4     |
| Neither legally married nor                                   | 5         | 4.6     |

**TABLE S1C. Comparing pCRH Levels in Subjects in the MRI Protocol With Subjects Eligible But Not in the Protocol**

|                   |       | N   | SD        |                | df  | F    | SIG  |
|-------------------|-------|-----|-----------|----------------|-----|------|------|
| wk15 CRH - MEAN   | noMRI | 85  | .1777844  | Between Groups | 1   | .011 | .917 |
|                   | mri   | 65  | .1602163  | Within Groups  | 148 |      |      |
| wk19 CRH - MEAN   | noMRI | 129 | -.0705060 | Between Groups | 1   | .176 | .675 |
|                   | mri   | 77  | -.0075490 | Within Groups  | 204 |      |      |
| wk25 CRH - MEAN   | noMRI | 87  | .0099925  | Between Groups | 1   | .241 | .624 |
|                   | mri   | 60  | -.0673128 | Within Groups  | 145 |      |      |
| wk31 CRH - MEAN   | noMRI | 114 | -.0230650 | Between Groups | 1   | .646 | .423 |
|                   | mri   | 84  | .0709460  | Within Groups  | 196 |      |      |
| : wk37 CRH - MEAN | noMRI | 86  | .0355027  | Between Groups | 1   | .322 | .572 |
|                   | mri   | 65  | -.0576674 | Within Groups  | 149 |      |      |

**TABLE S2A. Percentage of whole cortex and the different cortical regions that are significantly thinner in children exposed as fetuses to Placental CRH across gestation (Average) and at five separate gestational intervals**

| <b>THINNER</b>          | <b>Average<br/>N=97</b> | <b>15<br/>Weeks<br/>N=57</b> | <b>~19<br/>Weeks<br/>N=70</b> | <b>~25<br/>Weeks<br/>N=50</b> | <b>~30<br/>Weeks<br/>N=79</b> | <b>~35<br/>Weeks<br/>N=55</b> |
|-------------------------|-------------------------|------------------------------|-------------------------------|-------------------------------|-------------------------------|-------------------------------|
| <b>Whole Brain</b>      | <b>12</b>               | <b>10</b>                    | <b>6</b>                      | <b>9</b>                      | <b>12</b>                     | <b>6</b>                      |
| <b>Frontal Cortex</b>   | <b>16</b>               | <b>15</b>                    | <b>8</b>                      | <b>11</b>                     | <b>15</b>                     | <b>7</b>                      |
| <b>Parietal Cortex</b>  | <b>10</b>               | <b>9</b>                     | <b>5</b>                      | <b>13</b>                     | <b>10</b>                     | <b>3</b>                      |
| <b>Temporal Cortex</b>  | <b>15</b>               | <b>6</b>                     | <b>9</b>                      | <b>4</b>                      | <b>19</b>                     | <b>10</b>                     |
| <b>Occipital Cortex</b> | <b>3</b>                | <b>3</b>                     | <b>4</b>                      | <b>6</b>                      | <b>2</b>                      | <b>1</b>                      |
| <b>Cingulate/Limbic</b> | <b>0</b>                | <b>1</b>                     | <b>0</b>                      | <b>4</b>                      | <b>0</b>                      | <b>2</b>                      |

**TABLE S2B. Percentage of whole cortex and the different cortical regions that are significantly thicker in children exposed as fetuses to Placental CRH across gestation (Average) and at five separate gestational intervals**

| <b>THICKER</b>          | <b>Average</b> | <b>15<br/>Weeks</b> | <b>~19<br/>Weeks</b> | <b>~25<br/>Weeks</b> | <b>~30<br/>Weeks</b> | <b>~35<br/>Weeks</b> |
|-------------------------|----------------|---------------------|----------------------|----------------------|----------------------|----------------------|
| <b>Whole Brain</b>      | <b>1</b>       | <b>2</b>            | <b>4</b>             | <b>3</b>             | <b>1</b>             | <b>1</b>             |
| <b>Frontal Cortex</b>   | <b>0</b>       | <b>1</b>            | <b>4</b>             | <b>2</b>             | <b>0</b>             | <b>0</b>             |
| <b>Parietal Cortex</b>  | <b>1</b>       | <b>3</b>            | <b>4</b>             | <b>2</b>             | <b>0</b>             | <b>1</b>             |
| <b>Temporal Cortex</b>  | <b>0</b>       | <b>1</b>            | <b>2</b>             | <b>4</b>             | <b>1</b>             | <b>0</b>             |
| <b>Occipital Cortex</b> | <b>4</b>       | <b>3</b>            | <b>5</b>             | <b>6</b>             | <b>4</b>             | <b>9</b>             |
| <b>Cingulate/Limbic</b> | <b>4</b>       | <b>4</b>            | <b>5</b>             | <b>3</b>             | <b>9</b>             | <b>5</b>             |

**TABLE S3. Percentage of structures of the frontal and temporal lobes that are thinner in children exposed to placental CRH at 19 weeks gestation. The results are presented for the left (LH) and right (RH) hemisphere.**

| <b>LH Medial Surface Frontal</b> | <b>Percent of Structure</b> | <b>RH Medial Surface Frontal</b> | <b>Percent of Structure</b> |
|----------------------------------|-----------------------------|----------------------------------|-----------------------------|
|                                  |                             |                                  |                             |
| <b>Orbital Frontal</b>           | <b>10</b>                   | <b>Orbital Frontal</b>           | <b>0</b>                    |
| <b>Paracentral</b>               | <b>23</b>                   | <b>Paracentral</b>               | <b>7</b>                    |

| <b>LH Lateral Surface Frontal</b> | <b>Percent of Structure</b> | <b>RH Lateral Surface Frontal</b> | <b>Percent of Structure</b> |
|-----------------------------------|-----------------------------|-----------------------------------|-----------------------------|
|                                   |                             |                                   |                             |
| <b>Superior Frontal</b>           | <b>5</b>                    | <b>Superior Frontal</b>           | <b>0</b>                    |
| <b>Rostral Middle Frontal</b>     | <b>11</b>                   | <b>Rostral Middle Frontal</b>     | <b>8</b>                    |
| <b>Frontal Pole</b>               | <b>69</b>                   | <b>Frontal Pole</b>               | <b>78</b>                   |
| <b>Pars Triangularis</b>          | <b>0</b>                    | <b>Pars Triangularis</b>          | <b>10</b>                   |
| <b>Parsorbitalis</b>              | <b>6</b>                    | <b>Parsorbitalis</b>              | <b>9</b>                    |
| <b>Lateral Orbital Frontal</b>    | <b>9</b>                    | <b>Lateral Orbital Frontal</b>    | <b>15</b>                   |
| <b>Parsopercularis</b>            | <b>0</b>                    | <b>Parsopercularis</b>            | <b>21</b>                   |
| <b>Caudal Middle Frontal</b>      | <b>32</b>                   | <b>Caudal Middle Frontal</b>      | <b>2</b>                    |
| <b>Precentral</b>                 | <b>5</b>                    | <b>Precentral</b>                 | <b>6</b>                    |
| <b>Insula</b>                     | <b>3</b>                    | <b>Insula</b>                     | <b>4</b>                    |

| <b>LH Lateral Surface Temporal</b> | <b>Percent of Structure</b> | <b>RH Lateral Surface Temporal</b> | <b>Percent of Structure</b> |
|------------------------------------|-----------------------------|------------------------------------|-----------------------------|
|                                    |                             |                                    |                             |
| <b>Superior Temporal</b>           | <b>26</b>                   | <b>Superior Temporal</b>           | <b>10</b>                   |
| <b>Transverse Temporal</b>         | <b>0</b>                    | <b>Transverse Temporal</b>         | <b>0</b>                    |
| <b>Middle Temporal</b>             | <b>7</b>                    | <b>Middle Temporal</b>             | <b>8</b>                    |
| <b>Post Sup Temp sulcus</b>        | <b>19</b>                   | <b>Post Sup Temp sulcus</b>        | <b>0</b>                    |
| <b>Inferior Temporal</b>           | <b>12</b>                   | <b>Inferior Temporal</b>           | <b>6</b>                    |
| <b>Fusiform</b>                    | <b>0</b>                    | <b>Fusiform</b>                    | <b>0</b>                    |
| <b>Parahippocampal</b>             | <b>0</b>                    | <b>Parahippocampal</b>             | <b>0</b>                    |
| <b>Entorhinal</b>                  | <b>0</b>                    | <b>Entorhinal</b>                  | <b>0</b>                    |
| <b>Temporal Pole</b>               | <b>0</b>                    | <b>Temporal Pole</b>               | <b>14</b>                   |



**TABLE S4. Percentage of structures of the frontal and temporal lobes that are thinner in children exposed to placental CRH at 31 weeks gestation. The results are presented for the left (LH) and right (RH) hemisphere.**

| <b>LH Medial Surface Frontal</b> | <b>Percent of Structure</b> | <b>RH Medial Surface Frontal</b> | <b>Percent of Structure</b> |
|----------------------------------|-----------------------------|----------------------------------|-----------------------------|
|                                  |                             |                                  |                             |
| <b>Orbital Frontal</b>           | <b>10</b>                   | <b>Orbital Frontal</b>           | <b>16</b>                   |
| <b>Paracentral</b>               | <b>43</b>                   | <b>Paracentral</b>               | <b>8</b>                    |

| <b>LH Lateral Surface Frontal</b> | <b>Percent of Structure</b> | <b>RH Lateral Surface Frontal</b> | <b>Percent of Structure</b> |
|-----------------------------------|-----------------------------|-----------------------------------|-----------------------------|
|                                   |                             |                                   |                             |
| <b>Superior Frontal</b>           | <b>12</b>                   | <b>Superior Frontal</b>           | <b>6</b>                    |
| <b>Rostral Middle Frontal</b>     | <b>4</b>                    | <b>Rostral Middle Frontal</b>     | <b>24</b>                   |
| <b>Frontal Pole</b>               | <b>0</b>                    | <b>Frontal Pole</b>               | <b>9</b>                    |
| <b>Pars Triangularis</b>          | <b>19</b>                   | <b>Pars Triangularis</b>          | <b>19</b>                   |
| <b>Parsorbitalis</b>              | <b>6</b>                    | <b>Parsorbitalis</b>              | <b>9</b>                    |
| <b>Lateral Orbital Frontal</b>    | <b>19</b>                   | <b>Lateral Orbital Frontal</b>    | <b>31</b>                   |
| <b>Parsopercularis</b>            | <b>13</b>                   | <b>Parsopercularis</b>            | <b>14</b>                   |
| <b>Caudal Middle Frontal</b>      | <b>26</b>                   | <b>Caudal Middle Frontal</b>      | <b>25</b>                   |
| <b>Precentral</b>                 | <b>12</b>                   | <b>Precentral</b>                 | <b>17</b>                   |
| <b>Insula</b>                     | <b>18</b>                   | <b>Insula</b>                     | <b>0</b>                    |

| <b>LH Lateral Surface Temporal</b> | <b>Percent of Structure</b> | <b>RH Lateral Surface Temporal</b> | <b>Percent of Structure</b> |
|------------------------------------|-----------------------------|------------------------------------|-----------------------------|
|                                    |                             |                                    |                             |
| <b>Superior Temporal</b>           | <b>35</b>                   | <b>Superior Temporal</b>           | <b>24</b>                   |
| <b>Transverse Temporal</b>         | <b>0</b>                    | <b>Transverse Temporal</b>         | <b>12</b>                   |
| <b>Middle Temporal</b>             | <b>27</b>                   | <b>Middle Temporal</b>             | <b>27</b>                   |
| <b>Post Sup Temp sulcus</b>        | <b>7</b>                    | <b>Post Sup Temp sulcus</b>        | <b>0</b>                    |
| <b>Inferior Temporal</b>           | <b>13</b>                   | <b>Inferior Temporal</b>           | <b>14</b>                   |
| <b>Fusiform</b>                    | <b>4</b>                    | <b>Fusiform</b>                    | <b>5</b>                    |
| <b>Parahippocampal</b>             | <b>2</b>                    | <b>Parahippocampal</b>             | <b>3</b>                    |
| <b>Entorhinal</b>                  | <b>9</b>                    | <b>Entorhinal</b>                  | <b>5</b>                    |
| <b>Temporal Pole</b>               | <b>66</b>                   | <b>Temporal Pole</b>               | <b>98</b>                   |

TABLE S5. Percentages of structures of the frontal and temporal lobes that are thinner in children exposed to pCRH at 19 weeks gestation using log transformed CRH values. Values can be compared with findings in Table S2. Highlights show the nearly identical results for the transformed and the z-scored data.

| LH Medial Surface Frontal          | Percent of Structure        | RH Medial Surface Frontal          | Percent of Structure        |
|------------------------------------|-----------------------------|------------------------------------|-----------------------------|
| Orbital Frontal                    | 0.0842                      | Orbital Frontal                    | 0.0000                      |
| <b>Paracentral</b>                 | <b>0.2370</b>               | <b>Paracentral</b>                 | 0.0484                      |
| <b>LH Lateral Surface</b>          |                             | <b>RH Lateral Surface</b>          | 0.0000                      |
| Superior Frontal                   | 0.0470                      | Superior Frontal                   | 0.0000                      |
| Rostral Middle Frontal             | 0.0810                      | Rostral Middle Frontal             | 0.0638                      |
| <b>Frontal Pole</b>                | <b>0.5302</b>               | <b>Frontal Pole</b>                | <b>0.7600</b>               |
| Pars Triangularis                  | 0.0000                      | Pars Triangularis                  | 0.0844                      |
| Parsorbitalis                      | 0.0929                      | Parsorbitalis                      | 0.0400                      |
| Lateral Orbital Frontal            | 0.0777                      | Lateral Orbital Frontal            | 0.1479                      |
| Parsopercularis                    | 0.0000                      | <b>Parsopercularis</b>             | <b>0.1819</b>               |
| <b>Caudal Middle Frontal</b>       | <b>0.3100</b>               | <b>Caudal Middle Frontal</b>       | 0.0233                      |
| Precentral                         | 0.0438                      | Precentral                         | 0.0493                      |
| Insula                             | 0.0197                      | Insula                             | 0.0383                      |
| <b>LH Lateral Surface Temporal</b> | <b>Percent of Structure</b> | <b>RH Lateral Surface Temporal</b> | <b>Percent of Structure</b> |
| <b>Superior Temporal</b>           | <b>0.1718</b>               | Superior Temporal                  | 0.0923                      |
| Transverse Temporal                | 0.0000                      | Transverse Temporal                | 0.0000                      |
| Middle Temporal                    | 0.0626                      | Middle Temporal                    | 0.0726                      |
| <b>Post Sup Temp sulcus</b>        | <b>0.1743</b>               | <b>Post Sup Temp sulcus</b>        | 0.0000                      |
| Inferior Temporal                  | 0.0956                      | Inferior Temporal                  | 0.0397                      |
| Fusiform                           | 0.0000                      | Fusiform                           | 0.0000                      |
| Parahippocampal                    | 0.0000                      | Parahippocampal                    | 0.0000                      |
| Entorhinal                         | 0.0000                      | Entorhinal                         | 0.0000                      |
| Temporal pole                      | 0.0000                      | Temporal pole                      | 0.1100                      |

**TABLE S6. Exploratory Analysis of Sex Differences**

|                               |        | N  | Mean      | Std. Deviation        | df  | F     | Sig. |
|-------------------------------|--------|----|-----------|-----------------------|-----|-------|------|
| Child's age (IN YEARS)        | male   | 54 | 6.9983    | <b>Between Groups</b> | 1   | .003  | .954 |
|                               | female | 54 | 7.0075    | <b>Within Groups</b>  | 106 |       |      |
| Mother's age (IN YEARS)       | male   | 54 | 37.2519   | <b>Between Groups</b> | 1   | .482  | .489 |
|                               | female | 54 | 38.0847   | <b>Within Groups</b>  | 106 |       |      |
| Final GAB (in WEEKS)          | male   | 54 | 39.2011   | <b>Between Groups</b> | 1   | .001  | .979 |
|                               | female | 54 | 39.2090   | <b>Within Groups</b>  | 106 |       |      |
| Birthweight percentile by sex | male   | 51 | 53.431    | <b>Between Groups</b> | 1   | .035  | .852 |
|                               | female | 52 | 54.481    | <b>Within Groups</b>  | 101 |       |      |
| Apgar score at five minutes   | male   | 53 | 9.02      | <b>Between Groups</b> | 1   | .658  | .419 |
|                               | female | 53 | 8.98      | <b>Within Groups</b>  | 104 |       |      |
| Total number of OB Risks      | male   | 50 | .36       | <b>Between Groups</b> | 1   | .203  | .653 |
|                               | female | 48 | .42       | <b>Within Groups</b>  | 96  |       |      |
| WISC - Percentile rank        | male   | 54 | 68.9130   | <b>Between Groups</b> | 1   | .463  | .498 |
|                               | female | 54 | 65.3759   | <b>Within Groups</b>  | 106 |       |      |
| CBCL - Internalizing Total    | male   | 54 | 5.3889    | <b>Between Groups</b> | 1   | .085  | .771 |
|                               | female | 54 | 5.6481    | <b>Within Groups</b>  | 106 |       |      |
| CBCL - Externalizing Total    | male   | 54 | 6.1296    | <b>Between Groups</b> | 1   | .025  | .874 |
|                               | female | 54 | 5.9444    | <b>Within Groups</b>  | 106 |       |      |
| wk19 CRH - MEAN               | male   | 38 | -.2509275 | <b>Between Groups</b> | 1   | 3.519 | .065 |
|                               | female | 39 | .2295890  | <b>Within Groups</b>  | 75  |       |      |
| : wk31 CRH - MEAN             | male   | 44 | .0633554  | <b>Between Groups</b> | 1   | .009  | .926 |
|                               | female | 40 | .0792957  | <b>Within Groups</b>  | 82  |       |      |
| CESD Z-SCORE                  | male   | 51 | -.1351109 | <b>Between Groups</b> | 1   | .023  | .880 |
|                               | female | 50 | -.1090865 | <b>Within Groups</b>  | 99  |       |      |
| STAI - Z-SCORE                | male   | 51 | -.0698441 | <b>Between Groups</b> | 1   | .009  | .927 |
|                               | female | 50 | -.0524384 | <b>Within Groups</b>  | 99  |       |      |

**TABLE S7A. Correlations Among CRH Levels and Maternal Characteristics**

|                           | CRH Level Week 19 | CRH Level Week 31 | Mother's age | Years of school completed | Household income-previous year | WAIS: POI index score | Trait Anxiety | CESD (Depression) | Beck Depression Index |
|---------------------------|-------------------|-------------------|--------------|---------------------------|--------------------------------|-----------------------|---------------|-------------------|-----------------------|
| CRH Level Week 19         | 1                 |                   |              |                           |                                |                       |               |                   |                       |
| CRH Level Week 31         | .386**            | 1                 |              |                           |                                |                       |               |                   |                       |
| Mother's age              | -.041             | -.053             | 1            |                           |                                |                       |               |                   |                       |
| years of school completed | .024              | -.025             | .214*        | 1                         |                                |                       |               |                   |                       |
| household income-previous | -.037             | -.108             | .299**       | .595**                    | 1                              |                       |               |                   |                       |
| WAIS: POI index score     | .025              | .085              | .125         | .489**                    | .501**                         | 1                     |               |                   |                       |
| Trait Anxiety             | .218              | .037              | .035         | -.318**                   | -.442**                        | -.162                 | 1             |                   |                       |
| CESD (Depression)         | .040              | -.031             | -.003        | -.326**                   | -.331**                        | -.197*                | .573**        | 1                 |                       |
| Beck Depression Index     | .086              | .097              | .083         | -.190*                    | -.398**                        | -.188                 | .703**        | .524**            | 1                     |

\*\* . Correlation is significant at the 0.01 level (2-tailed).

\* . Correlation is significant at the 0.05 level (2-tailed).

**TABLE S7B. Correlations Among CRH Levels, Birth Outcomes and Child Sex**

|                             | CRH Level Week 19 | CRH Level Week 31 | Child's sex | GAB    | Apgar score at five minutes | Total number of OB Risks |
|-----------------------------|-------------------|-------------------|-------------|--------|-----------------------------|--------------------------|
| CRH Level Week 19           | 1                 |                   |             |        |                             |                          |
| CRH Level Week 31           | .386**            | 1                 |             |        |                             |                          |
| Child's sex                 | .212              | .010              | 1           |        |                             |                          |
| GAB                         | .020              | -.170             | .003        | 1      |                             |                          |
| Apgar score at five minutes | .046              | -.117             | -.079       | .036   | 1                           |                          |
| Total number of OB Risks    | -.047             | .201              | .046        | -.255* | -.183                       | 1                        |

\*\* . Correlation is significant at the 0.01 level (2-tailed).

\* . Correlation is significant at the 0.05 level (2-tailed).

**TABLE S7C. Correlations Among CRH, Gestational Age at Birth and Birth Weight in Total Sample (N=578–791)**

|              | GAB     | Birth weight | wk19 CRH | wk31 CRH |
|--------------|---------|--------------|----------|----------|
| GAB          | 1       |              |          |          |
| Birth weight | .654**  | 1            |          |          |
| wk19 CRH     | -.023   | -.071        | 1        |          |
| wk31 CRH     | -.256** | -.283**      | .209**   | 1        |

\*\* . Correlation is significant at the 0.01 level (2-tailed).
